# Supplementary figures and images for: Comparing the Effects of Differential and Visuo-Motor Training on Functional Performance, Biomechanical, and Psychological Factors in Athletes after ACL Reconstruction: A Randomized Controlled Trial
Source: MDPI journal article supplement (doi:10.3390/jcm12082845), 2023-04-13

## File S1. CONSORT 2010 Flow Diagram

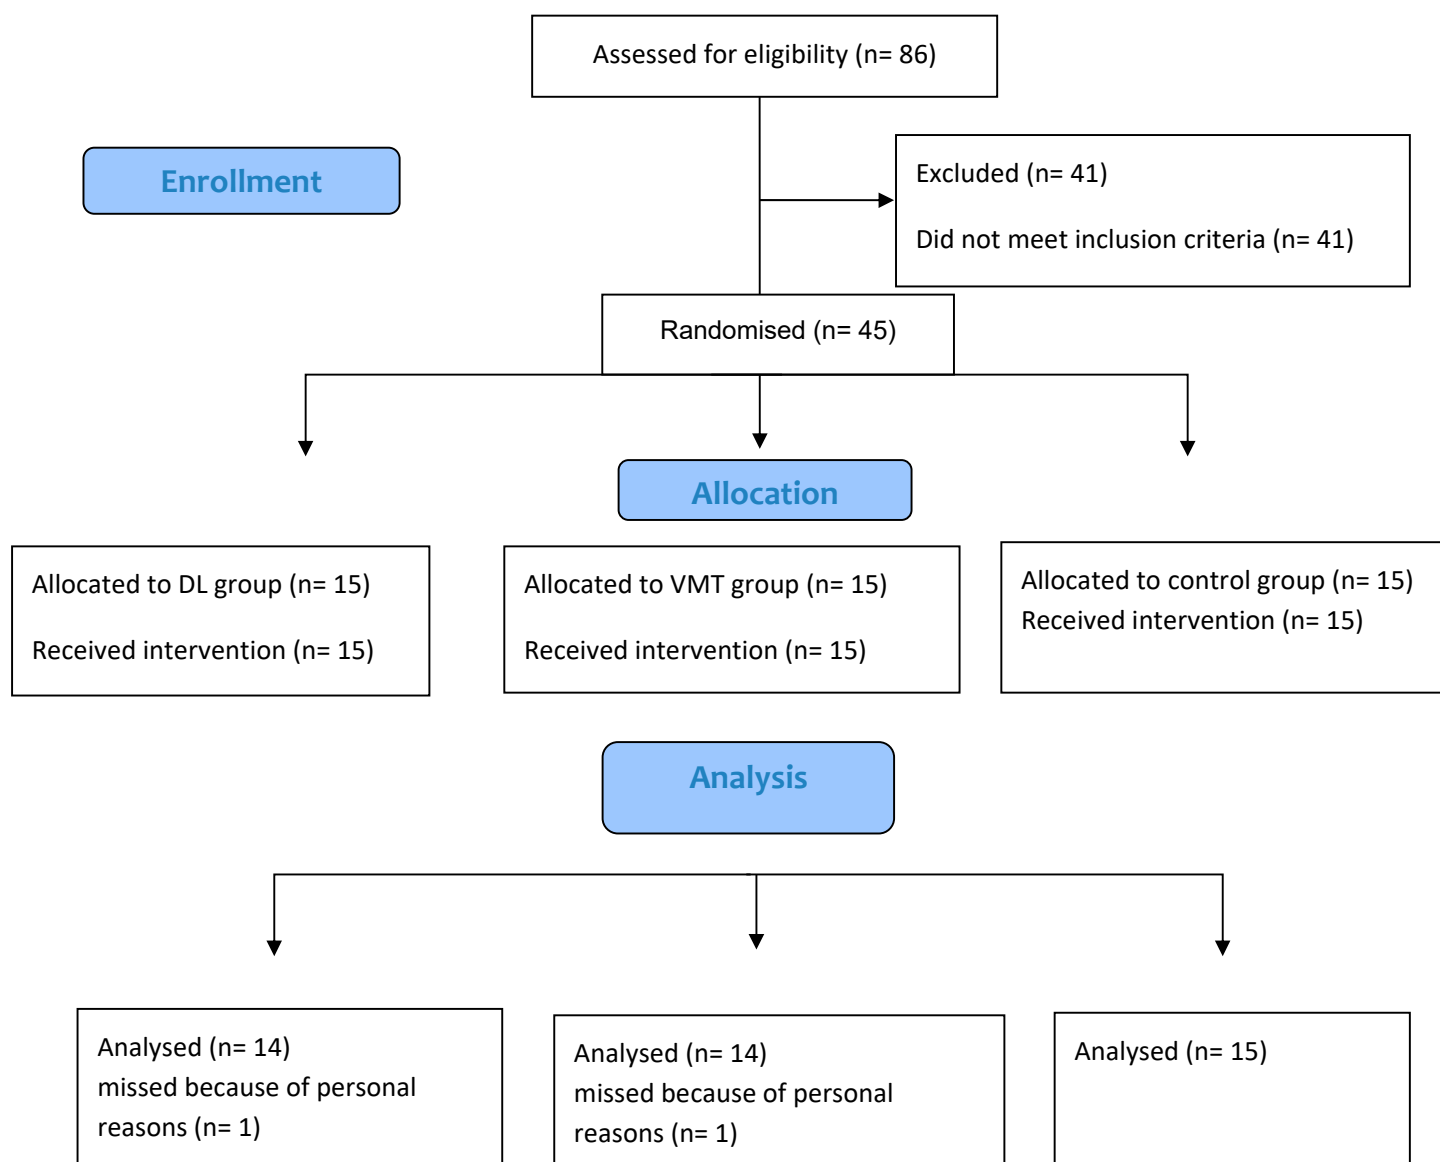

Supplement: s1 [file s1]
